# Supplementary material for: Ethanolysis of selected catalysis by functionalized acidic ionic liquids: an unexpected effect of ILs structural functionalization on selectivity phenomena
Source: Royal Society of Chemistry journal article supplement (doi:10.1039/d1nj04885f), 2021-12-14
Supplement: d1nj04885f1.pdf [file d1nj04885f1.pdf]

Electronic supplementary information

**Ethanolysis of selected carbohydrates catalyzed by functionalized  
acidic ionic liquids: An unexpected effect of ILs structural  
functionalization on selectivity phenomena**

Janusz Nowicki\*, Ewa Nowakowska - Bogdan

*Lukasiewicz Research Network - Institute of Heavy Organic Synthesis "Blachownia", Energetykow 9,  
PL-47-225 Kedzierzyn-Kozle, Poland*

*\*corresponding author, e-mail: [janusz.nowicki@icso.lukasiewicz.gov.pl](mailto:janusz.nowicki@icso.lukasiewicz.gov.pl)*

## 1. NMR and FT-IR spectra of synthesized ionic liquids

**[bmim]HSO<sub>4</sub>**, Yield 93.1%, IR (neat): 3275, <sup>1</sup>H-NMR (200 MHz, D<sub>2</sub>O): δ (ppm) 9.06 (s, 1H) 7.79 (s, 1H), 7.74 (s, 1H), 4.18 (m, 2H), 3.76 (2, 3H), 1.75 (m, 2H), 1.25 (m, 2H), 0.91 (t, 3H); <sup>13</sup>C-NMR (120 MHz, D<sub>2</sub>O): δ (ppm) 137.14, 126.2, 123.6, 47.60, 32.77, 34.42, 19.59, 13.47; MS (ESI-M<sup>+</sup>) m/z 83 [HIm<sup>+</sup>] (20%), 127.0 [M<sup>+</sup>] (100%).

**[hemim]HSO<sub>4</sub>**. Yield 92.6%, IR (neat): 3277, 3241(OH). <sup>1</sup>H-NMR (200 MHz, D<sub>2</sub>O): δ (ppm) 8.64 (s, 1H); 7.40 (s, 1H); 7.35(s, 1H); 4.19 (m, 2H); 3.79 (m, 2H); 3.78 (s, 3H), <sup>13</sup>C-NMR (120 MHz, D<sub>2</sub>O): δ (ppm) 136.4, 123.6, 122.4, 59.8, 51.1, 35.8; MS (ESI-M<sup>+</sup>) 127.0 [M<sup>+</sup>] (100%).

**[hpmim]HSO<sub>4</sub>**. Yield 91.7%, IR (neat): 3276, 3241 (OH), <sup>1</sup>H-NMR (200 MHz, D<sub>2</sub>O): δ (ppm) 8.65 (s, 1H); 7.49 (s, 1H); 7.43 (s, 1H), 4.20 (dd, 1H), 4.02 (dd, 1H); 3.98; 3.80 (s, 3H), 3.49 (m, 2H); 1.91 (m, 2H), <sup>13</sup>C-NMR (120 MHz, D<sub>2</sub>O): δ (ppm) 136.8, 123.2, 122.5, 58.2, 48.9, 36.6, 31.5; MS (ESI-M<sup>+</sup>) m/z 83 [HIm<sup>+</sup>] (9%), 147.1 [M<sup>+</sup>] (100%)

**[glymim]HSO<sub>4</sub>**. Yield 92.3%, IR (neat): 3275, 3238 (OH), <sup>1</sup>H-NMR (200 MHz, D<sub>2</sub>O): δ (ppm) 8.77 (s, 1H), 7.48 (s, 1H); 7.43 (s, 1H); 4.28 (dd, 2H); 4.01 (m, 1H); 3.91; 3.94; 3.89 (s, 3H); 3.61 (m, 2H), <sup>13</sup>C-NMR (120 MHz, D<sub>2</sub>O): δ (ppm) 137.3, 123.2, 123.1, 69.8, 62.4, 51.7, 35.7; MS (ESI-M<sup>+</sup>) m/z 83 [HIm<sup>+</sup>](41%), 157.1 [M<sup>+</sup>] (100%)

**[bmmim]HSO<sub>4</sub>**, Yield 92.8%, IR (neat): 3277, <sup>1</sup>H-NMR (200 MHz, D<sub>2</sub>O): δ (ppm) 7.78 (d, 1H); 7.51 (d, 1H); 4.19 (m, 2H); 4.00 (a, 3H); 2.77 (s, 3H), 1.76 (m, 2H), 1.35 (m, 2H), 0.92 (t, 3H); <sup>13</sup>C-NMR (120 MHz, D<sub>2</sub>O): δ (ppm) 145.42, 123.45, 212.95, 49.00, 35.87, 32.39, 20.16, 13.84, 10.30; MS (ESI-M<sup>+</sup>) m/z 83 [HIm<sup>+</sup>] (30%), 141.0 [M<sup>+</sup>] (100%).

## 2. GC/MS spectra of the representative products of ethanolysis

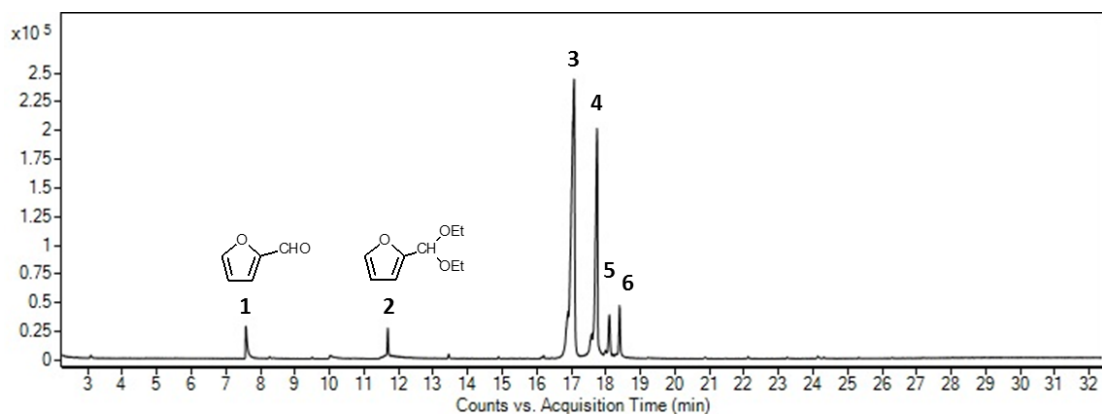

**Fig. S1.** GC chromatogram of the reaction product of xylose with ethanol

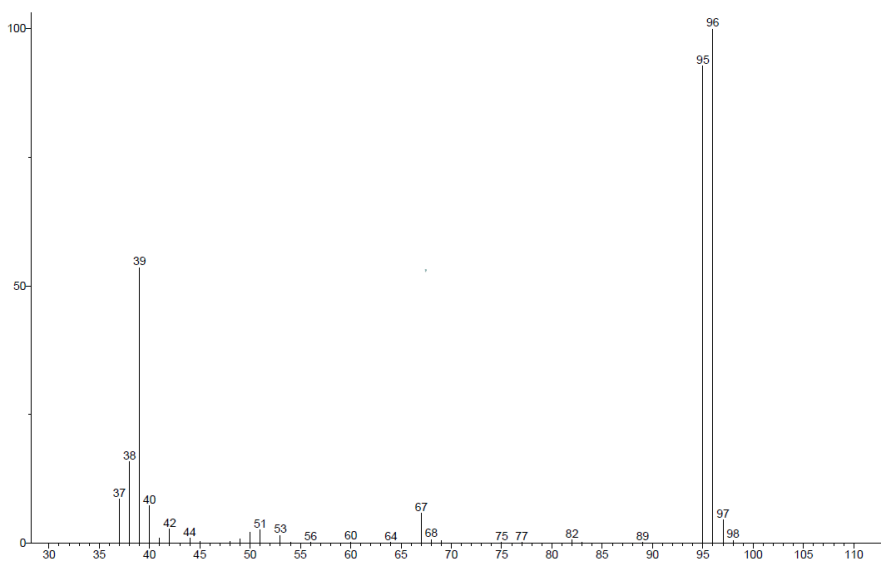

**Fig. S2.** MS spectrum of component 1 ( $\tau = 7.58$  min.)

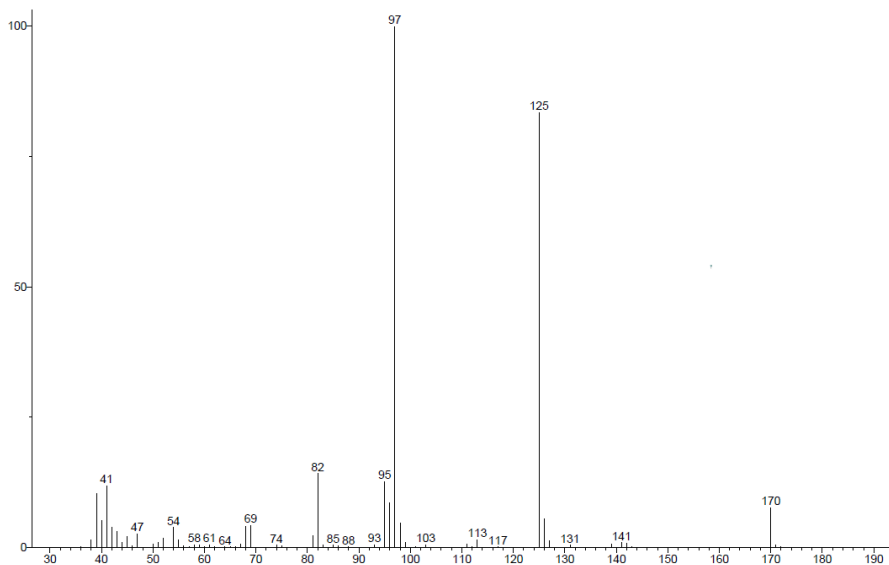

**Fig. S3.** MS spectrum of component 2 (11.68 min.)

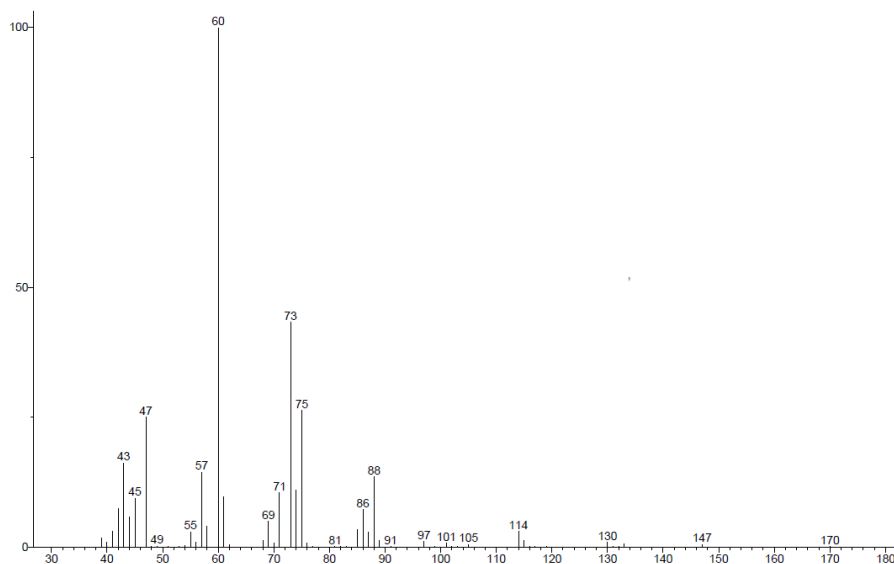

**Fig. S4.** MS spectrum of component 3 ( $\tau = 17.04$  min.)

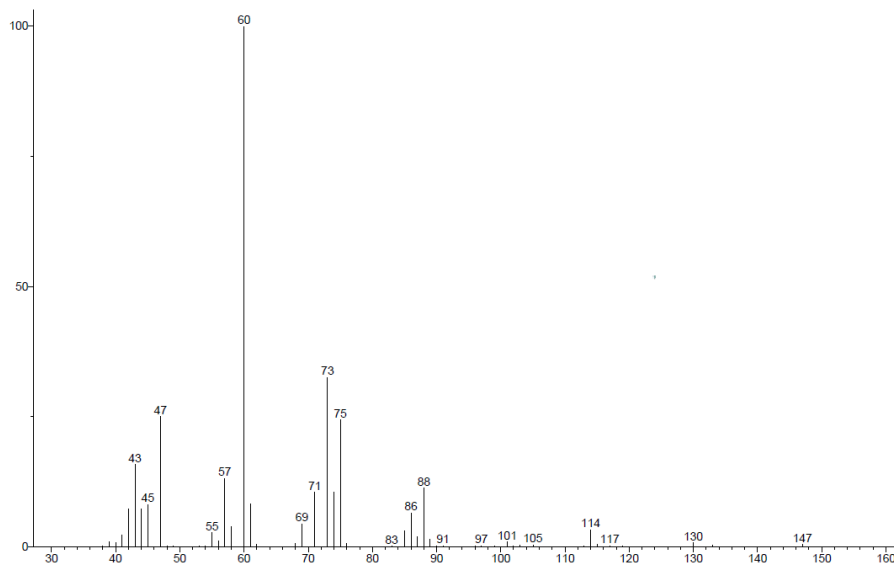

**Fig. S5.** MS spectrum of component 4 ( $\tau = 17.73$  min.)

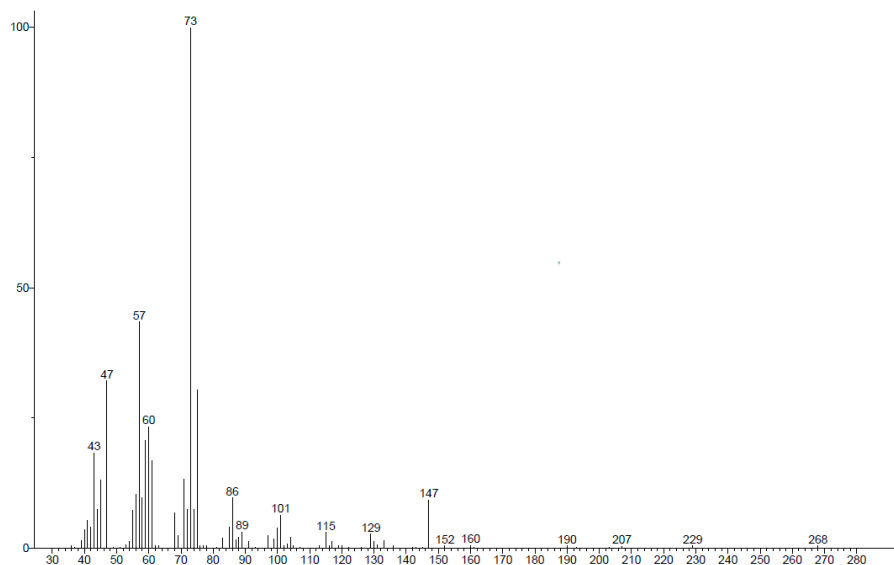

**Fig. S6.** MS spectrum of component 5 ( $\tau = 18.09$  min.)

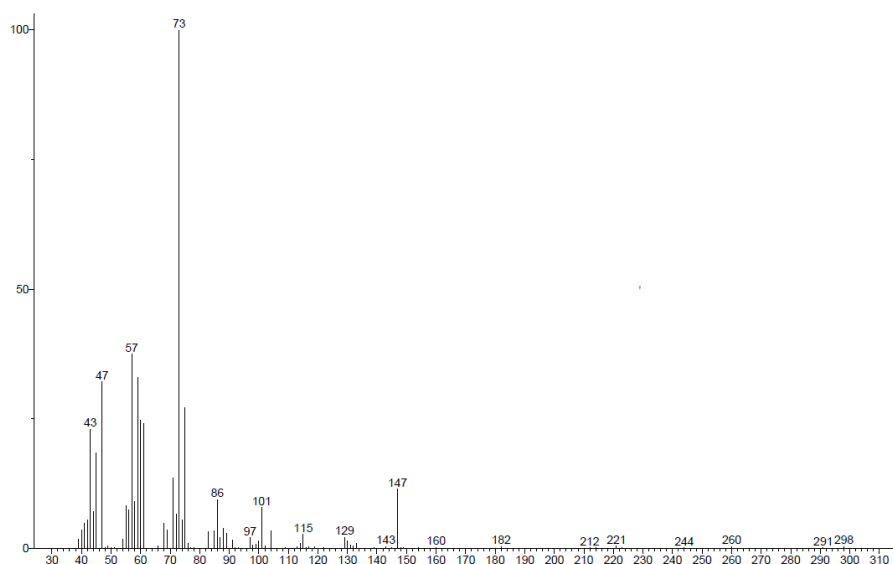

**Fig. S7.** MS spectrum of component 6 ( $\tau = 18.40$  min.)

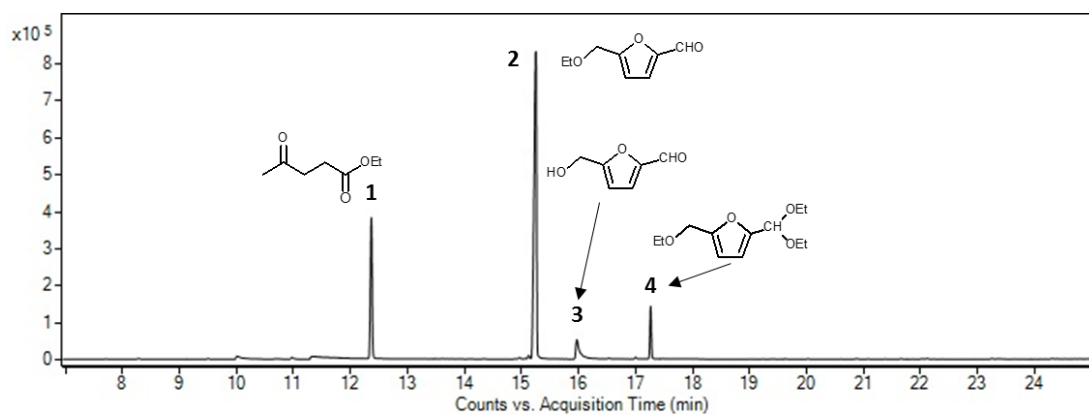

**Fig. S8.** GC chromatogram of the reaction product of fructose with ethanol

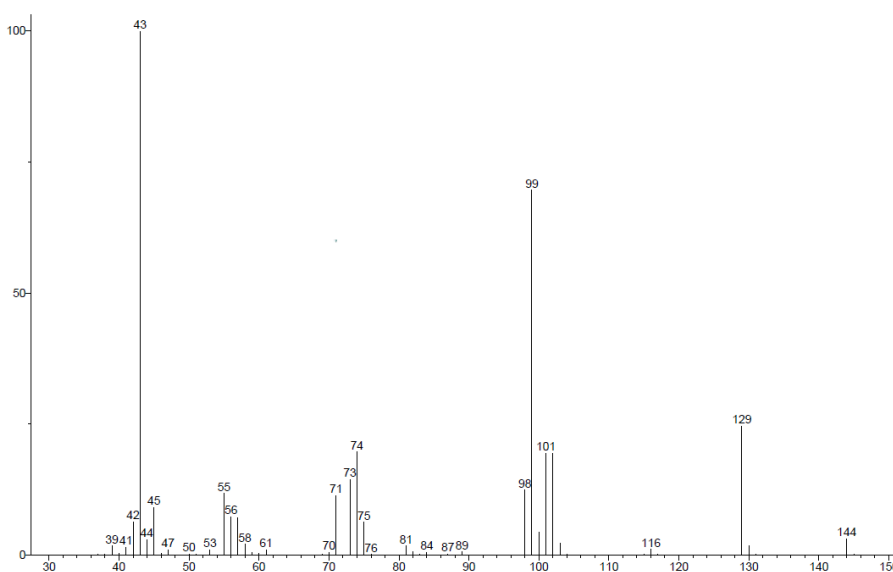

**Fig. S9.** MS spectrum of component 1 (ethyl levulinate),  $\tau = 12.36$  min.

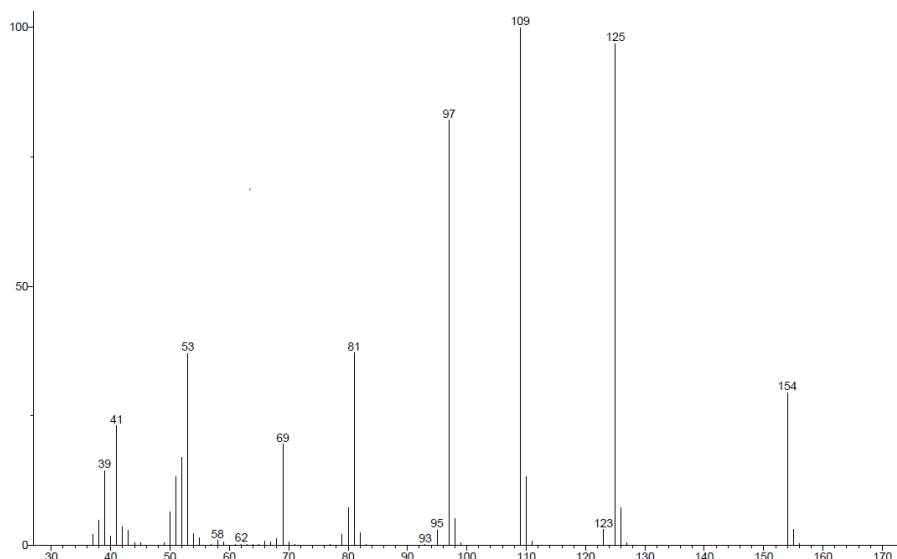

**Fig. S10.** MS spectrum of component **2** (5-ethoxyfuraldehyde),  $\tau = 15.27$  min.

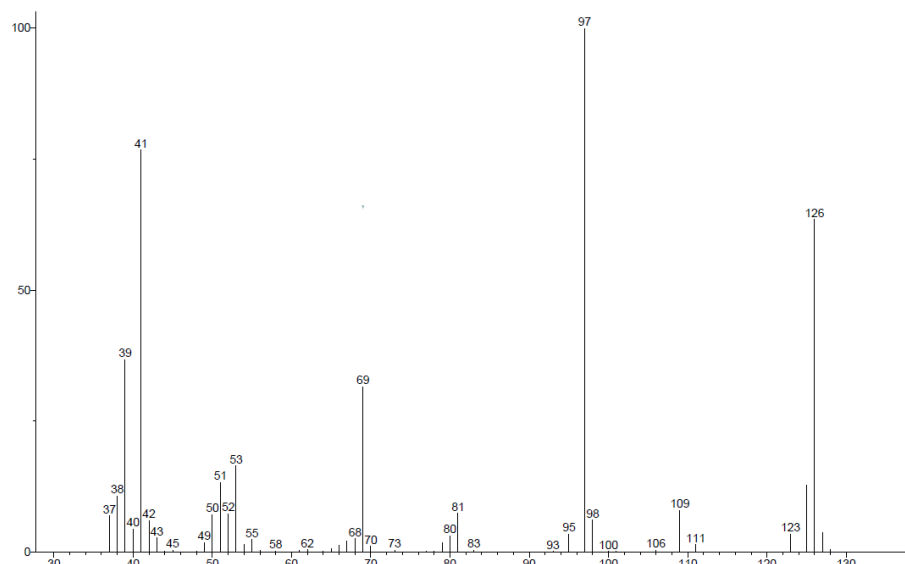

**Fig. S11.** MS spectrum of component **3** (5-hydroxymethylfurfural),  $\tau = 15.97$  min.

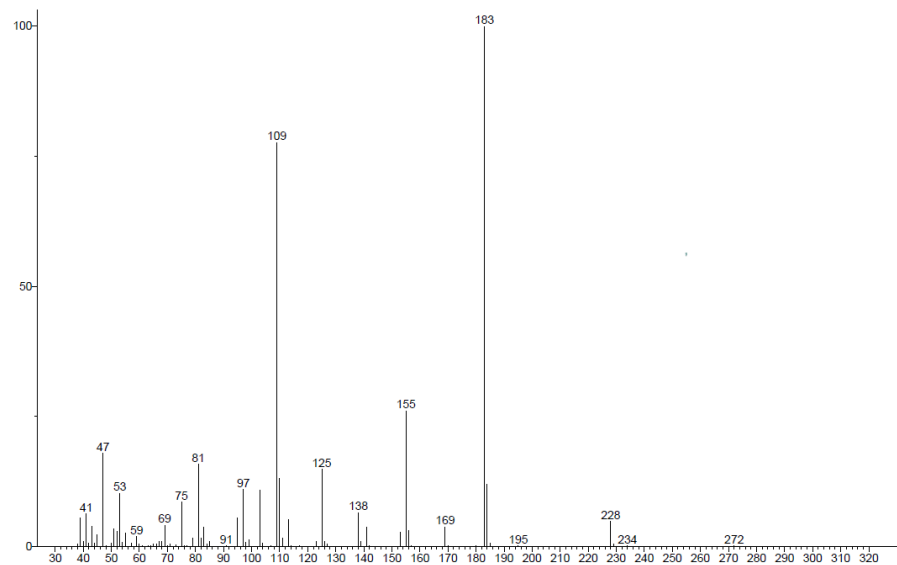

**Fig. S12.** MS spectrum of component **4** (diethylacetal 5-ethoxyfuraldehyde),  $\tau = 17.26$  min.

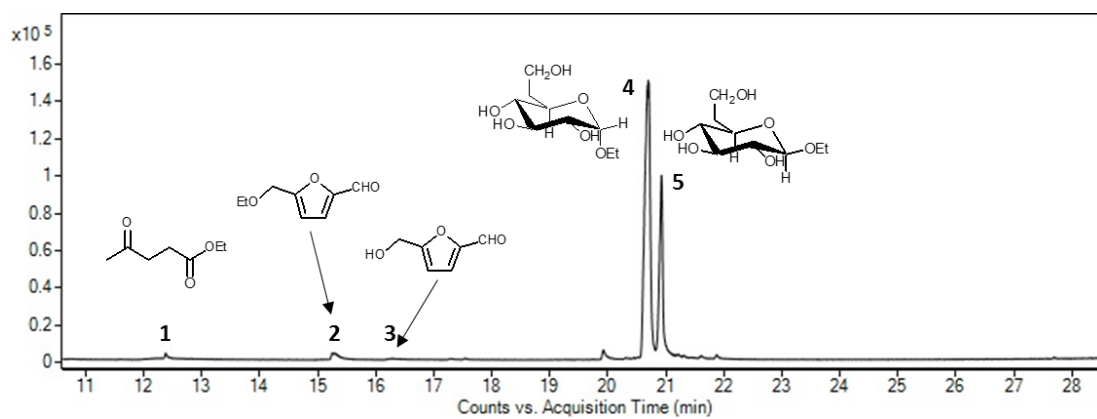

**Fig. S13.** GC chromatogram of the reaction product of glucose with ethanol

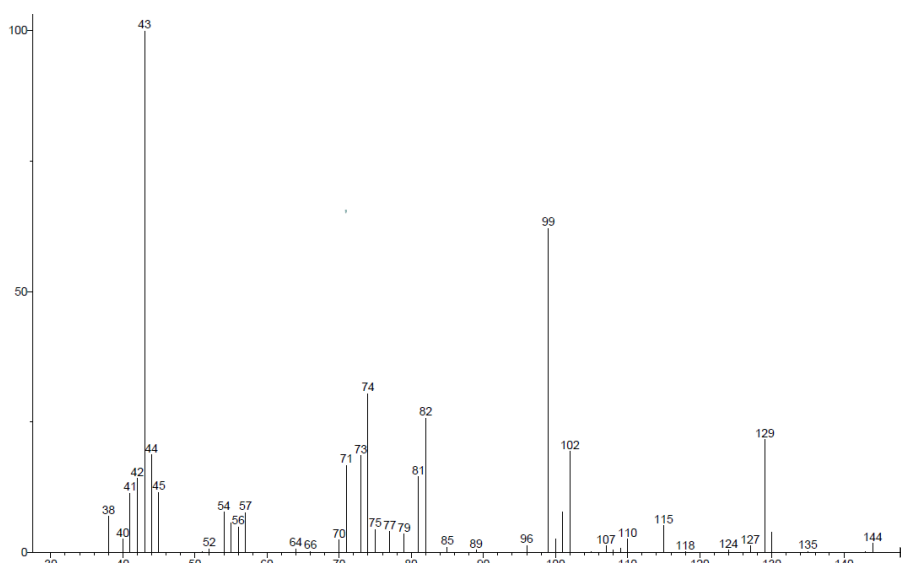

**Fig. S14.** MS spectrum of component 1 (ethyl levulinate),  $\tau = 12.28$

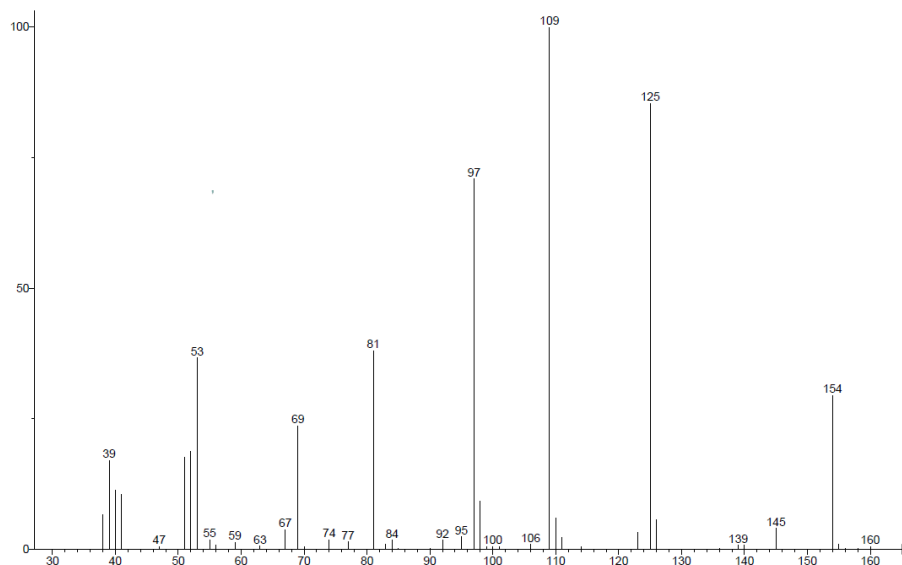

**Fig. S15.** MS spectrum of component 2 (5-ethoxyfuraldehyde),  $\tau = 15.27$

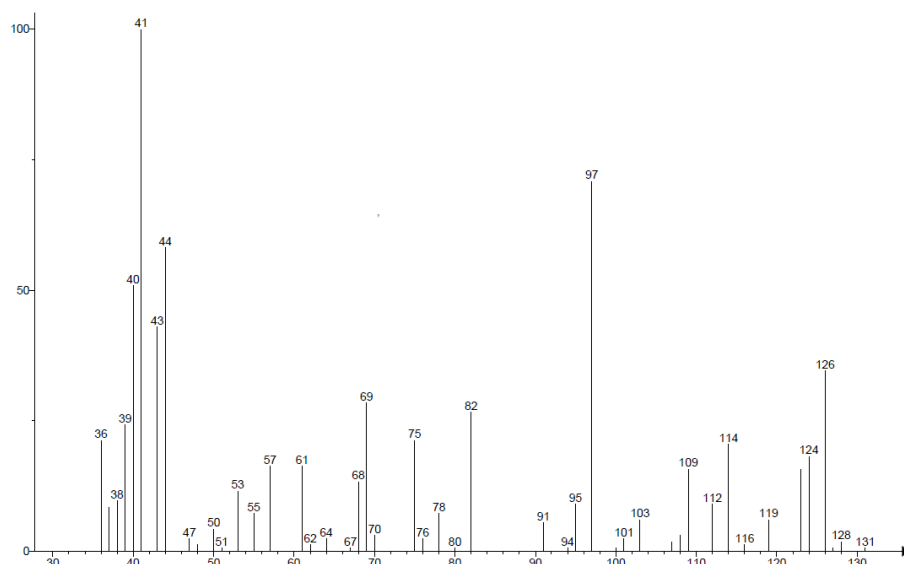

**Fig. S16.** MS spectrum of component **3** (5-hydroxymethylfurfural),  $\tau = 16.28$  min.

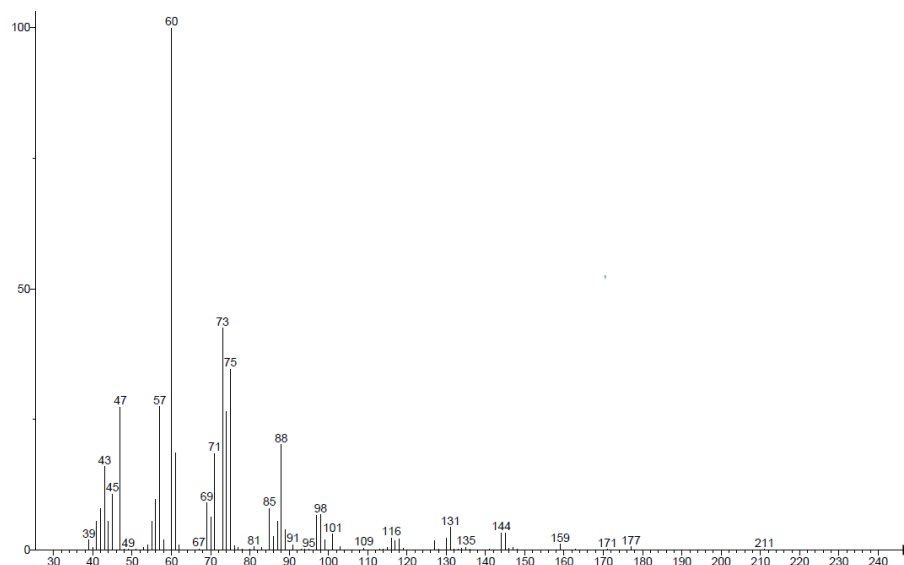

**Fig. S17.** MS spectrum of component **4** (ethyl  $\alpha$ -glucopyranoside),  $\tau = 20.69$  min.

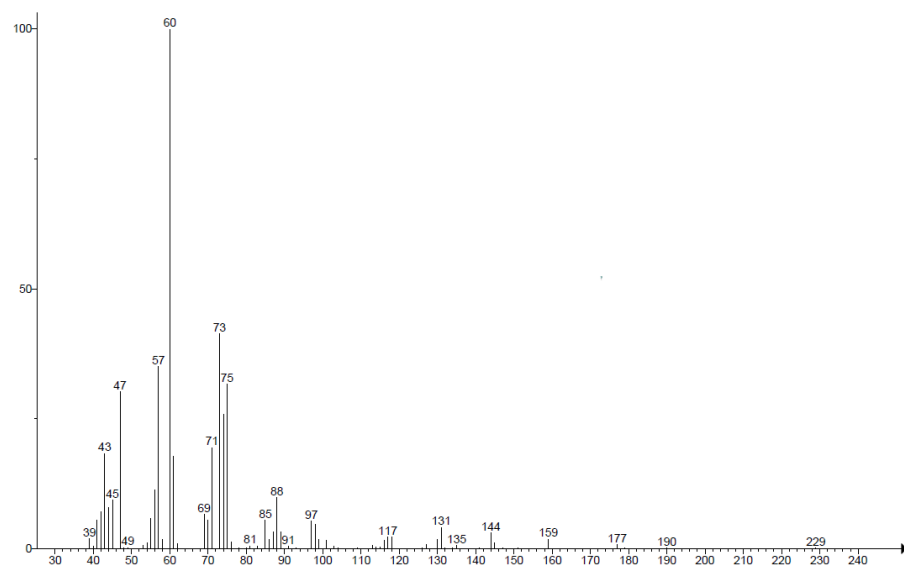

**Fig. S18.** MS spectrum of component **5** (ethyl  $\beta$ -glucopyranoside),  $\tau = 20.93$  min.
